# Supplementary material for: Intrabody Targeting HIF-1α Mediates Transcriptional Downregulation of Target Genes Related to Solid Tumors
Source: MDPI journal article supplement (doi:10.3390/ijms222212335), 2021-11-15
Supplement: s1 [file s1]

## Supporting Information

### **Intrabody targeting HIF-1 $\alpha$ mediates transcriptional downregulation of target genes related to solid tumors**

Yaozhong Hu<sup>1, 2</sup>, Ema Romão<sup>2</sup>, Cécile Vincke<sup>2</sup>, Lea Brys<sup>2</sup>, Yvon Elkrim<sup>2</sup>, Marylène Vandevenne<sup>3</sup>, Changxiao Liu<sup>4, \*</sup>, Serge Muyldermans<sup>2, \*</sup>

1. Research Institute of Public Health, School of Medicine, Nankai University, Tianjin, China.
2. Laboratory of Cellular and Molecular Immunology, Vrije Universiteit Brussel, Pleinlaan 2, 1050 Brussels, Belgium.
3. Chargé de recherche FRS-FNRS, Macromolécules biologiques, Centre d'ingénierie des protéines, Université de Liège.
4. State Key Laboratory of Drug Delivery Technology and Pharmacokinetics, Tianjin Institute of Pharmaceutical Research, Tianjin, China.

\* Corresponding Authors:

Serge Muyldermans

serge.muyldermans@vub.be

tel: +32 2 629 19 69

Changxiao Liu

liuchangxiao@163.com

tel: +86 22 8535 8948

**Table S1.** Properties of selected Nbs

| Nbs           | MW    | pI   | Yield <sup>a</sup> | T <sub>m</sub> value <sup>b</sup> | Affinity <sup>c</sup> |
|---------------|-------|------|--------------------|-----------------------------------|-----------------------|
|               | kDa   | —    | mg/L               | °C                                | nM                    |
| <b>sNb42</b>  | 15.72 | 7.97 | 1.5                | 57.5 ± 0.11                       | 134.6 ± 1.40          |
| <b>sNb43</b>  | 15.69 | 7.22 | 2.2                | 61.2 ± 0.10                       | 6.9 ± 1.28            |
| <b>sNb44</b>  | 15.98 | 8.84 | 2.4                | 66.4 ± 0.32                       | 8.2 ± 2.04            |
| <b>sNb410</b> | 15.77 | 7.21 | 1.4                | 72.2 ± 0.24                       | 4.7 ± 1.99            |
| <b>sNb431</b> | 15.75 | 6.70 | 1.6                | 69.1 ± 0.07                       | 67.8 ± 1.75           |
| <b>sNb462</b> | 15.78 | 7.96 | 2.4                | 68.8 ± 0.13                       | 1.4 ± 2.01            |
| <b>Nb747</b>  | 15.40 | 7.97 | 12.8               | 68.1 ± 0.27                       | 1.4 ± 1.52            |

<sup>a</sup>: Expression yield of purified Nbs (in mg per liter of culture medium).

<sup>b</sup>: Apparent affinity of selected Nbs were represented as mean ± SD, and the test was repeated for 3 times (n = 3).

<sup>c</sup>: Thermal stability of selected Nbs were represented as T<sub>m</sub> value generated from 3 repeated assay, with triplicates for every assay, and the data was illustrated as mean ± SD (n = 9).

**Table S2.** Primes of HIF-1 target genes for qRT-PCR analysis

| Gene                      | Name    | Primer                          |
|---------------------------|---------|---------------------------------|
| <b>HIF-1 target genes</b> | PGK1 F  | 5'-TGGGAACAAGGTTAAAGCCGA-3',    |
|                           | PGK1 R  | 5'-AAAACCCACCAGCCTTCTGT-3'      |
|                           | BNIP3 F | 5'-GCCATCGGATTGGGGATCTAT-3',    |
|                           | BNIP3 R | 5'-GCCACCCCAGGATCTAACAG-3';     |
|                           | CA9 F   | 5'-GCCTTTGCCAGAGTTGACGA-3'      |
|                           | CA9 R   | 5'-TCTGAGCCTTCCTCAGCGAT-3'      |
|                           | GAPDH F | 5'-TGCACCACCAACTGCTTAGC-3',     |
|                           | GAPDH R | 5'-GGCATGGACTGTGGTCATGAG-3'     |
| <b>Reference gene</b>     | B2M F   | 5'-TGCTGTCTCCATGTTTGATGTATCT-3' |
|                           | B2M R   | 5'-TCTCTGCTCCCCACCTCTAAGT-3'    |

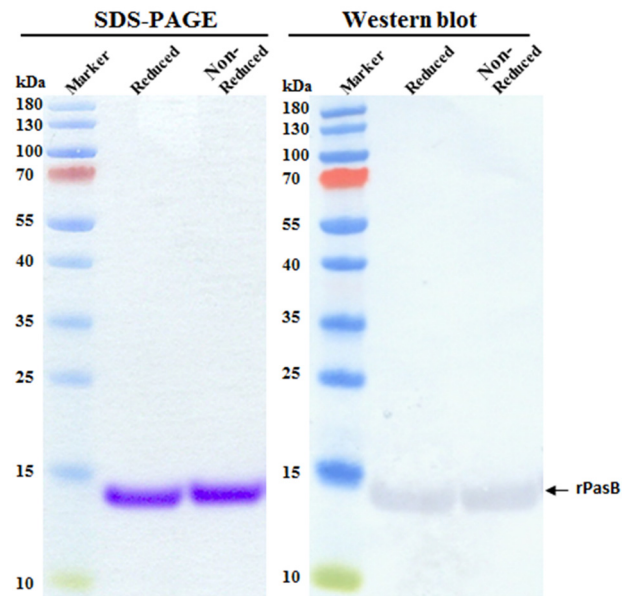

**Figure S1.** Identification of rPasB by SDS-PAGE and western blot. rPasB protein was loaded on gel and separated under reducing and non-reducing conditions. The bands were visualized by Coomassie staining and the presence of the His-tag was confirmed by western blot with anti-His tag IgG and HRP conjugated goat anti-mouse IgG.

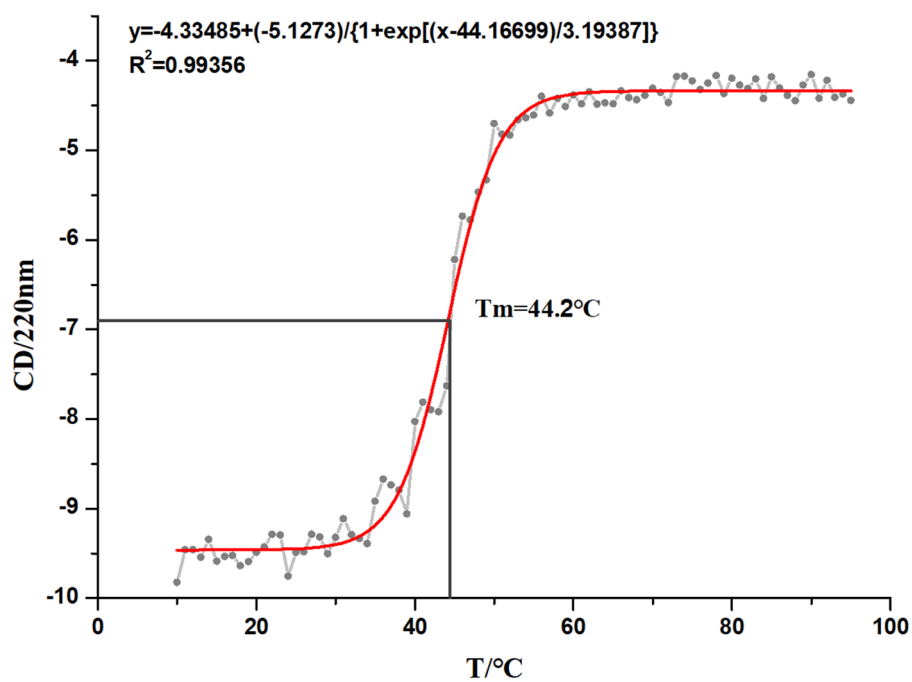

**Figure S2.** Thermal stability of rPasB. Temperature-dependent denaturation on the basis of changes in circular dichroism. The curve was analyzed via non-linear fitting, and temperature of 50% transition was 44.2°C for rPasB.



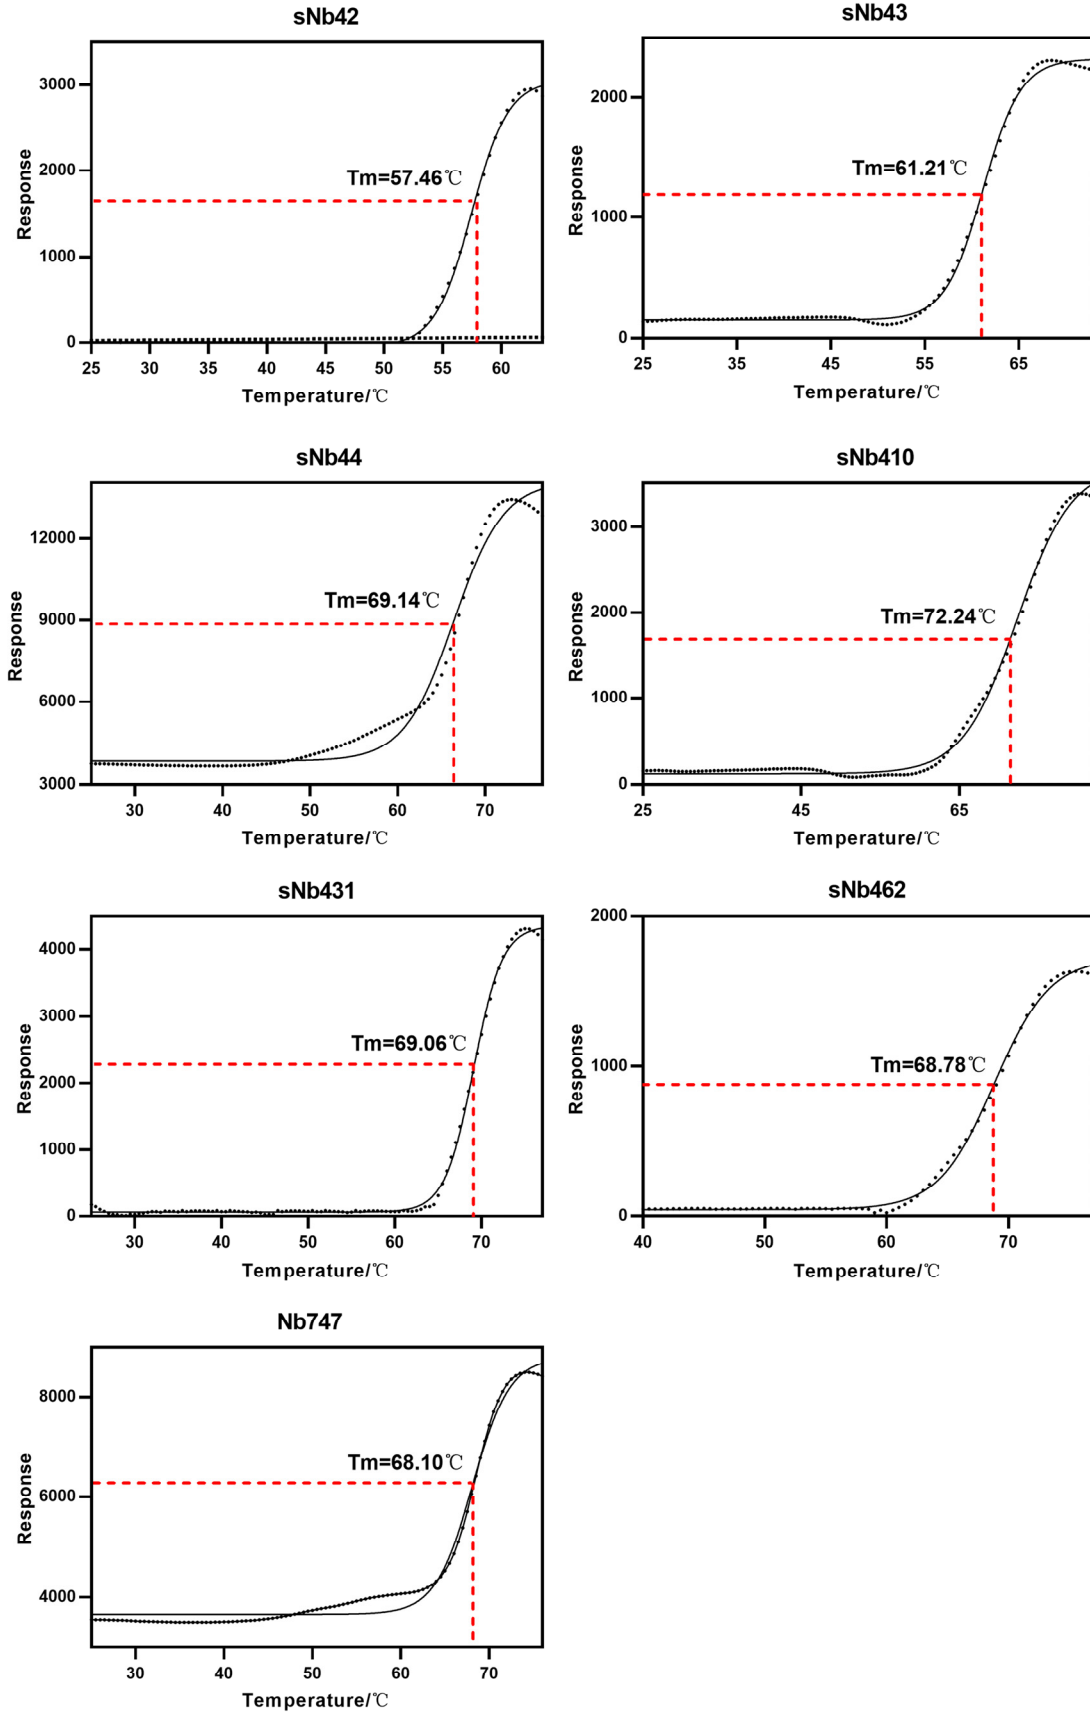

**Figure S4.** Thermal stability of selected Nbs. All data plotted are expressed as mean  $\pm$  SD ( $n = 3$ ).

Repeated at least 3 times for every test.

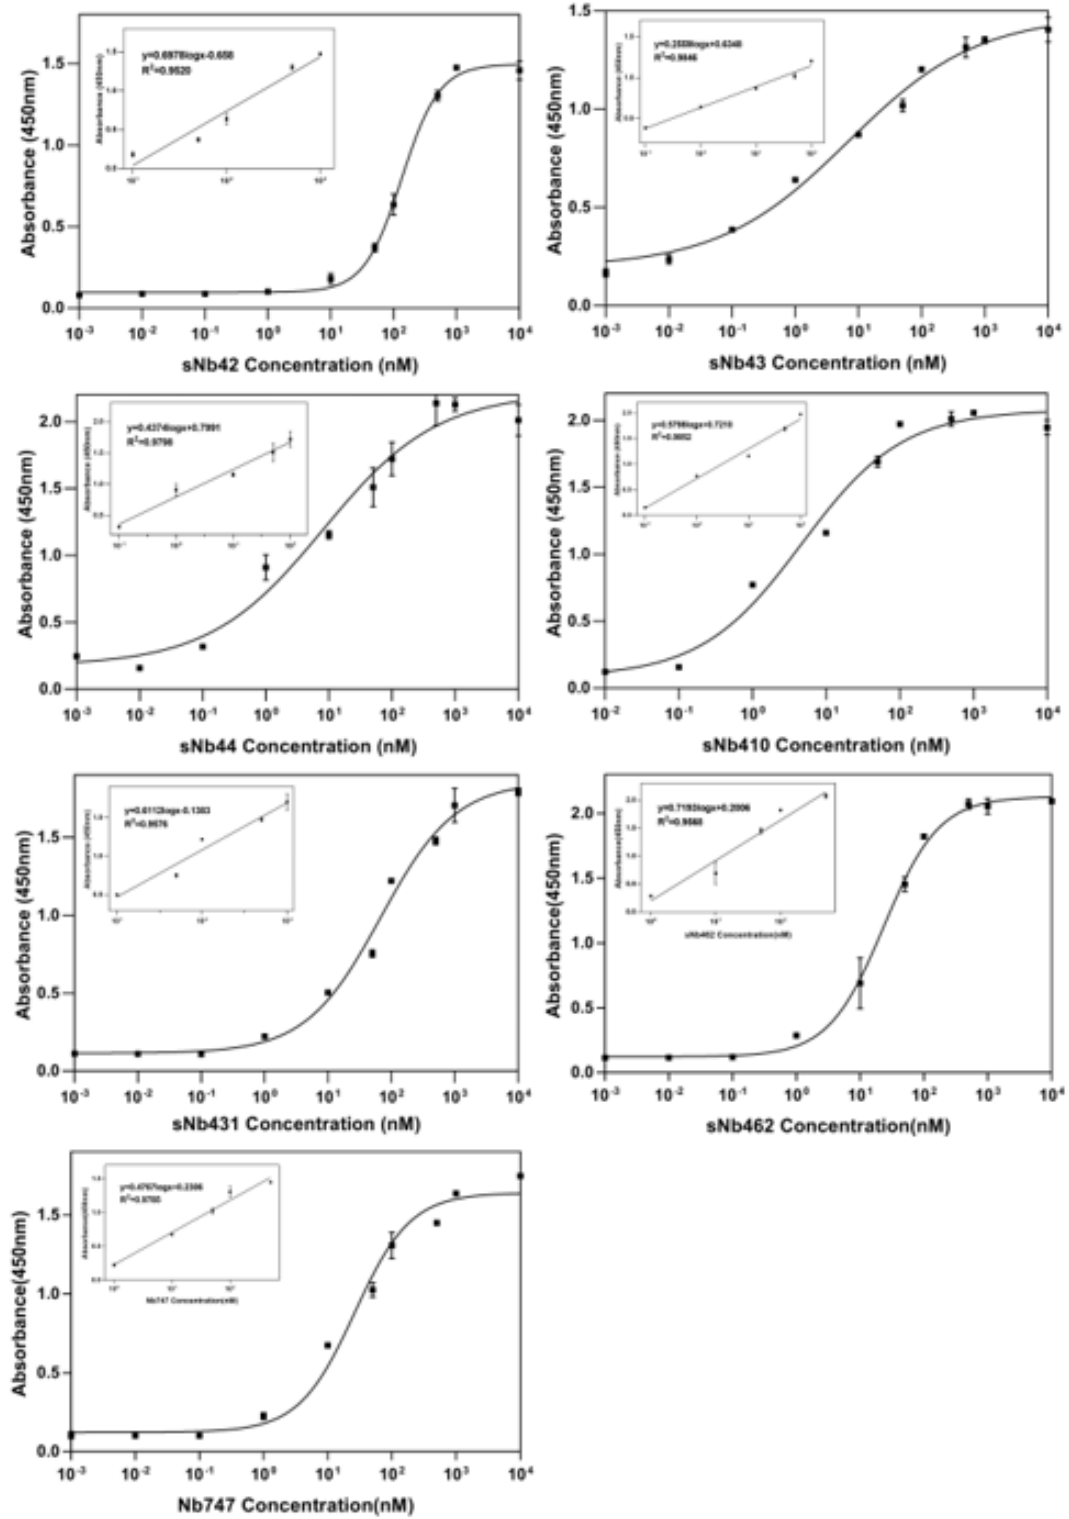

**Figure S5.** Binding affinity of selected Nbs. All data plotted are expressed as mean  $\pm$  SD (n = 3). Repeated at least 3 times for every sample.



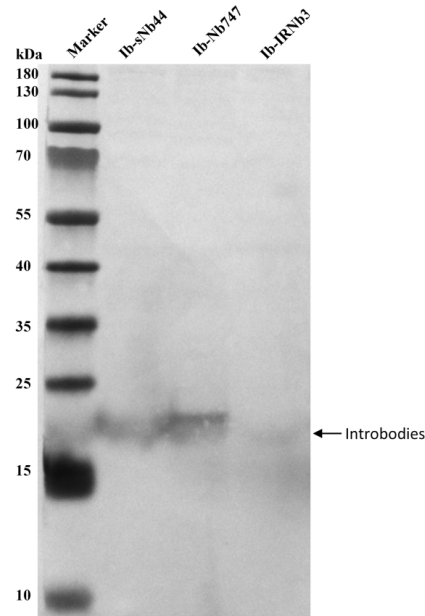

**Figure S6.** Detection of intrabodies expressed in HeLa cells by western blot. Intrabodies with His-tag were confirmed in HeLa cell lysate via western blot. A Nb targeting a HIF1-irrelevant antigen, referred to as Nb3, was intracellularly expressed as the negative control.

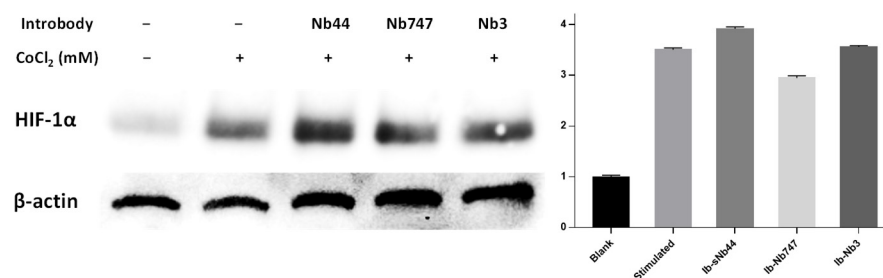

**Figure S7.** Level of HIF-1 $\alpha$  protein in HeLa cells after expression of intrabodies. Western blot was performed to check the level of HIF-1 $\alpha$  protein after expression of intrabodies of sNb44, Nb 747 and Nb3. HeLa cells without stimulating and intrabody expression served as the blank control. HeLa cells with stimulating of 0.3 mM CoCl<sub>2</sub> was used as the positive control to indicated the base level after stimulating. HeLa cells with intrabody expression were indicated as Ib-sNb44, Ib-Nb747 and Ib-Nb3.
